# Supplementary material
Source: publisher figshare collection journal article supplement (https://acs.figshare.com/ndownloader/files/7796749)
Supplement: Supplementary file 1 [file 7796749]

#######################################################################
#
#                 Cambridge Crystallographic Data Centre
#                                CCDC 
#
#######################################################################
#
# If this CIF has been generated directly or indirectly from an entry in the 
# Cambridge Structural Database, then it will include bibliographic, chemical, 
# crystal, experimental, refinement or atomic coordinate data resulting from 
# the CCDC's data processing and validation procedures. Files generated from 
# CSD entries are Copyright 2016 Cambridge Crystallographic Data Centre. They 
# may be used in bona fide research applications only, and may not be copied or 
# further disseminated in any form, whether machine-readable or not, except for 
# the purposes of generating routine backup copies on your local computer 
# system.
# 
# Files arising from any other source may also contain material that is the 
# copyright of third parties, including the originator, and you should check 
# with the originator concerning the permitted uses of the information 
# contained in this CIF.
#
# For further information on the CCDC and the free tools enCIFer and Mercury
# for validating and visualising CIF files, please visit www.ccdc.cam.ac.uk
#
#######################################################################

data_0001
_symmetry_cell_setting           hexagonal
_symmetry_space_group_name_H-M   'P 63'
_symmetry_Int_Tables_number      173
loop_
_symmetry_equiv_pos_site_id
_symmetry_equiv_pos_as_xyz
1 x,y,z
2 -x,-y,1/2+z
3 -y,x-y,z
4 -x+y,-x,z
5 x-y,x,1/2+z
6 y,-x+y,1/2+z
_cell_length_a                   34.088
_cell_length_b                   34.088
_cell_length_c                   37.906
_cell_angle_alpha                90
_cell_angle_beta                 90
_cell_angle_gamma                120
_cell_volume                     38145.4
loop_
_atom_site_label
_atom_site_type_symbol
_atom_site_fract_x
_atom_site_fract_y
_atom_site_fract_z
OAF O 1.52465 0.780457 0.875005
CAJ C 1.52188 0.755729 0.850576
NAH N 1.55886 0.762809 0.833059
CAL C 1.60397 0.800104 0.84195
CAC C 1.64 0.790958 0.826411
CAD C 1.60922 0.844987 0.828891
NAI N 1.48198 0.720568 0.840446
CAM C 1.43839 0.708847 0.856987
CAE C 1.41607 0.662033 0.87548
CAG C 1.40869 0.709762 0.826701
CAK C 1.41842 0.757389 0.814487
CAB C 1.45223 0.797428 0.837333
CAA C 1.43296 0.765823 0.775628
OAD O 1.43337 0.417192 0.932753
CAJ C 1.43659 0.442869 0.908113
OAE O 1.41026 0.432334 0.882286
CAF C 1.47581 0.490631 0.909802
CAG C 1.46821 0.519187 0.882444
CAK C 1.48663 0.567288 0.896242
CAA C 1.53932 0.595166 0.893709
NAH N 1.46941 0.59083 0.874266
CAI C 1.4494 0.612815 0.887826
OAC O 1.44224 0.612408 0.9198
NAB N 1.43795 0.635442 0.864611
NAB N 1.76876 0.882621 0.922016
CAE C 1.73276 0.843767 0.941142
CAF C 1.68603 0.833842 0.928453
CAG C 1.65002 0.786012 0.939876
CAH C 1.60499 0.785064 0.945996
CAK C 1.56679 0.736658 0.952803
CAA C 1.52149 0.736692 0.960268
NAI N 1.56066 0.708204 0.921515
CAJ C 1.55574 0.666437 0.924126
OAD O 1.55683 0.650313 0.952723
NAC N 1.55038 0.643403 0.893999
CAA C 1.31416 0.560886 1.05007
CAI C 1.36519 0.592727 1.0469
CAB C 1.38334 0.617049 1.08215
CAF C 1.3872 0.564409 1.03733
CAJ C 1.43822 0.594455 1.03084
CAC C 1.45912 0.563325 1.02493
NAG N 1.44734 0.622672 0.998864
CAH C 1.47904 0.667589 0.99794
OAE O 1.50047 0.68832 1.02448
NAD N 1.48534 0.688625 0.966521
CAG C 1.72468 0.702344 1.06226
CAE C 1.7651 0.735134 1.07743
CAL C 1.78869 0.778492 1.06305
OAD O 1.82815 0.8103 1.07803
CAF C 1.77184 0.789196 1.03324
CAH C 1.73153 0.756339 1.01786
CAM C 1.70775 0.712946 1.0325
CAI C 1.6642 0.677717 1.01606
CAN C 1.62338 0.673517 1.03664
CAA C 1.62713 0.721042 1.03981
NAJ N 1.58162 0.643979 1.01725
CAK C 1.54203 0.616134 1.03337
OAC O 1.53891 0.611595 1.0659
NAB N 1.50625 0.592524 1.0119
CAA C 1.50307 0.806167 1.15045
CAI C 1.52931 0.782794 1.13924
CAB C 1.57398 0.803491 1.15968
CAF C 1.50026 0.732153 1.14691
CAJ C 1.5252 0.706036 1.13818
CAC C 1.4933 0.655259 1.14694
NAG N 1.53711 0.709864 1.10043
CAH C 1.57761 0.715995 1.08972
OAE O 1.60676 0.720432 1.11114
NAD N 1.58472 0.716842 1.05474
OAD O 1.5297 0.444393 1.18828
CAJ C 1.53912 0.47051 1.16248
OAE O 1.53769 0.459602 1.13095
CAF C 1.55163 0.519051 1.17031
CAG C 1.59463 0.55113 1.14924
CAK C 1.60493 0.600484 1.15185
CAA C 1.64937 0.632089 1.13103
NAH N 1.56807 0.605498 1.13607
CAI C 1.54863 0.627042 1.15256
OAC O 1.55948 0.64242 1.18277
NAB N 1.51641 0.630429 1.13407
NAB N 1.85943 0.949658 1.10908
CAE C 1.82966 0.900506 1.11381
CAF C 1.79575 0.891123 1.14335
CAG C 1.76624 0.840143 1.149
CAH C 1.72285 0.830692 1.16794
CAK C 1.69916 0.783065 1.18385
CAA C 1.65912 0.777679 1.20764
NAI N 1.67873 0.748378 1.15638
CAJ C 1.67921 0.708847 1.15755
OAD O 1.70032 0.701022 1.18037
NAC N 1.65616 0.678835 1.13204
CAA C 1.49938 0.575553 1.31913
CAI C 1.54245 0.616812 1.30538
CAB C 1.565 0.650821 1.33567
CAF C 1.57421 0.600755 1.29124
CAJ C 1.61883 0.640185 1.27797
CAC C 1.64828 0.620639 1.2636
NAG N 1.61091 0.66454 1.24903
CAH C 1.63764 0.709796 1.24471
OAE O 1.66865 0.732728 1.26536
NAD N 1.62927 0.728833 1.21685
CAA C 1.84156 0.757389 1.23616
CAG C 1.80207 0.756677 1.25534
CAB C 1.80266 0.802272 1.2498
NAE N 1.75912 0.719823 1.24125
CAF C 1.72653 0.687608 1.2617
OAD O 1.7308 0.686186 1.29399
NAC N 1.68875 0.657054 1.24492
CAA C 1.61072 0.787604 1.37281
CAM C 1.65718 0.803491 1.35654
CAB C 1.6875 0.854336 1.36274
CAH C 1.67787 0.77751 1.37382
CAN C 1.7267 0.795666 1.36131
NAJ N 1.72736 0.790551 1.32274
CAL C 1.76588 0.80234 1.30573
OAF O 1.80229 0.818362 1.32169
NAD N 1.76342 0.796479 1.27072
CAG C 1.74572 0.769008 1.37959
NAI N 1.7248 0.723345 1.36363
CAK C 1.6913 0.686389 1.37907
OAE O 1.67559 0.688354 1.4078
NAC N 1.67533 0.647298 1.36189
OAF O 1.55721 0.809555 1.60032
CAJ C 1.53115 0.80156 1.62504
NAH N 1.54649 0.812807 1.65805
CAL C 1.59471 0.835502 1.66633
CAC C 1.61583 0.885839 1.65839
CAD C 1.6012 0.826593 1.70485
NAI N 1.48614 0.780592 1.62022
CAM C 1.46487 0.76562 1.5855
CAE C 1.4243 0.773614 1.5818
CAG C 1.44962 0.714877 1.58262
CAK C 1.48361 0.702547 1.59871
CAB C 1.45983 0.65387 1.61246
CAA C 1.5212 0.710948 1.57247
OAD O 1.39596 0.941765 1.50332
CAJ C 1.4281 0.971947 1.52057
OAE O 1.42467 0.993965 1.54558
CAF C 1.47472 0.981398 1.51153
CAG C 1.49464 0.971777 1.54477
CAK C 1.50152 0.930858 1.53854
CAA C 1.55233 0.945593 1.54136
NAH N 1.47761 0.896069 1.56574
CAI C 1.46097 0.851762 1.55906
OAC O 1.46348 0.838348 1.52946
NAB N 1.44151 0.822935 1.58584
NAB N 1.75025 0.856335 1.50873
CAE C 1.71544 0.869546 1.51134
CAF C 1.67976 0.846477 1.48256
CAG C 1.63927 0.853049 1.49005
CAH C 1.59454 0.809047 1.48201
CAK C 1.55626 0.820259 1.47884
CAA C 1.50929 0.776426 1.47414
NAI N 1.55616 0.844648 1.511
CAJ C 1.55575 0.88384 1.50939
OAD O 1.55457 0.900608 1.48098
NAC N 1.55595 0.903724 1.54004
CAA C 1.30912 0.753459 1.38265
CAI C 1.36026 0.772971 1.38627
CAB C 1.37916 0.767111 1.35118
CAF C 1.38197 0.823138 1.396
CAJ C 1.43249 0.843903 1.4041
CAC C 1.45257 0.895222 1.41191
NAG N 1.43976 0.822528 1.43563
CAH C 1.47061 0.808268 1.43652
OAE O 1.49332 0.810605 1.4103
NAD N 1.47484 0.790789 1.46771
CAG C 1.71614 1.02591 1.37548
CAE C 1.75694 1.03539 1.3597
CAL C 1.78181 1.01656 1.37318
OAD O 1.82171 1.02594 1.3578
CAF C 1.76601 0.98824 1.4026
CAH C 1.72537 0.978891 1.41848
CAM C 1.70022 0.997522 1.40479
CAI C 1.65634 0.987088 1.42186
CAN C 1.61622 0.950572 1.40091
CAA C 1.62064 0.907247 1.39738
NAJ N 1.57431 0.936752 1.42004
CAK C 1.53539 0.926793 1.40397
OAC O 1.53303 0.9314 1.37173
NAB N 1.49926 0.912328 1.42526
CAA C 1.49916 0.701666 1.27579
CAI C 1.52453 0.748819 1.29238
CAB C 1.571 0.77629 1.27455
CAF C 1.49554 0.771345 1.28734
CAJ C 1.52085 0.82219 1.29697
CAC C 1.4891 0.841532 1.28797
NAG N 1.53207 0.829439 1.33498
CAH C 1.57221 0.863956 1.34659
OAE O 1.60189 0.889531 1.32586
NAD N 1.57848 0.869105 1.38168
OAD O 1.51635 1.08421 1.24922
CAJ C 1.53212 1.07343 1.27489
OAE O 1.53959 1.09091 1.30491
CAF C 1.54197 1.03522 1.26922
CAG C 1.58463 1.04603 1.29022
CAK C 1.59639 1.00853 1.28541
CAA C 1.64158 1.02235 1.30528
NAH N 1.5605 0.965443 1.30077
CAI C 1.54193 0.925031 1.28365
OAC O 1.55246 0.921441 1.25304
NAB N 1.51101 0.88882 1.30196
NAB N 1.87138 0.937531 1.29747
CAE C 1.83853 0.952909 1.30293
CAF C 1.79287 0.918629 1.2876
CAG C 1.76487 0.940952 1.27858
CAH C 1.72028 0.904639 1.26252
CAK C 1.69305 0.925404 1.24824
CAA C 1.65267 0.888989 1.22563
NAI N 1.67267 0.93814 1.27687
CAJ C 1.67214 0.977502 1.27681
OAD O 1.69234 1.00701 1.25423
NAC N 1.64922 0.983193 1.30314
CAA C 1.48662 0.925065 1.11858
CAI C 1.53148 0.929469 1.13056
CAB C 1.55505 0.921576 1.09893
CAF C 1.56117 0.976757 1.14575
CAJ C 1.60739 0.984074 1.15741
CAC C 1.63603 1.03326 1.17163
NAG N 1.60217 0.95274 1.18617
CAH C 1.62916 0.934448 1.18904
OAE O 1.65822 0.941223 1.16662
NAD N 1.62227 0.907451 1.21706
CAA C 1.83232 1.08952 1.19298
CAG C 1.7913 1.05267 1.17361
CAB C 1.79076 1.00687 1.17625
NAE N 1.74928 1.04701 1.18984
CAF C 1.71488 1.04522 1.17055
OAD O 1.71715 1.04935 1.13808
NAC N 1.67793 1.03861 1.18875
CAA C 1.59424 0.830048 1.05308
CAM C 1.63991 0.861484 1.07022
CAB C 1.67185 0.842921 1.06334
CAH C 1.65883 0.908873 1.05411
CAN C 1.70791 0.940986 1.0655
NAJ N 1.71084 0.946067 1.10415
CAL C 1.75084 0.971913 1.12035
OAF O 1.78646 0.991695 1.10341
NAD N 1.75036 0.974657 1.15562
CAG C 1.72349 0.986513 1.04796
NAI N 1.70496 1.01124 1.06761
CAK C 1.67596 1.02283 1.05331
OAE O 1.66215 1.01263 1.02284
NAC N 1.6624 1.04569 1.07373
O O 1.8454 1.0755 1.29982
O O 1.7748 1.08163 1.26961
O O 1.85722 1.0779 1.08761
O O 1.86051 0.793295 1.13198
O O 1.78951 0.71823 1.16496
O O 1.85536 0.758811 1.35121
O O 1.83578 0.873204 0.954201
O O 1.90368 0.855691 1.1873
O O 1.89751 1.04928 1.25281
O O 1.89283 0.994337 1.19319
O O 1.45132 1.09701 1.33198
O O 1.88364 0.916868 1.22975
CAC C 1.36271 0.714843 1.2317
CAE C 1.38334 0.756745 1.20788
OAG O 1.39838 0.79675 1.22909
CAF C 1.42613 0.835638 1.2092
CAD C 1.42361 0.875203 1.22614
OAB O 1.46093 0.917918 1.21479
CAA C 1.60682 0.895324 0.962247
OAE O 1.60135 0.929401 0.980714
CAC C 1.55761 0.911211 0.994405
CAD C 1.52449 0.891902 0.963724
OAF O 1.53014 0.857859 0.946049
CAB C 1.57356 0.875982 0.933993

#END
#HEADER    ----                                    30-SEP-14   xxxx              
#COMPND    ---                                                                   
#REMARK   3
#REMARK   3 REFINEMENT.
#REMARK   3   PROGRAM     : REFMAC 5.8.0073  
#REMARK   3   AUTHORS     : MURSHUDOV,SKUBAK,LEBEDEV,PANNU,
#REMARK   3                 STEINER,NICHOLLS,WINN,LONG,VAGIN
#REMARK   3
#REMARK   3    REFINEMENT TARGET : MAXIMUM LIKELIHOOD
#REMARK   3
#REMARK   3  DATA USED IN REFINEMENT.
#REMARK   3   RESOLUTION RANGE HIGH (ANGSTROMS) :   1.45
#REMARK   3   RESOLUTION RANGE LOW  (ANGSTROMS) :  29.52
#REMARK   3   DATA CUTOFF            (SIGMA(F)) : NONE
#REMARK   3   COMPLETENESS FOR RANGE        (%) :  99.85
#REMARK   3   NUMBER OF REFLECTIONS             :    4342
#REMARK   3
#REMARK   3  FIT TO DATA USED IN REFINEMENT.
#REMARK   3   CROSS-VALIDATION METHOD          : THROUGHOUT
#REMARK   3   FREE R VALUE TEST SET SELECTION  : RANDOM
#REMARK   3   R VALUE     (WORKING + TEST SET) : 0.21235
#REMARK   3   R VALUE            (WORKING SET) :  0.21062
#REMARK   3   FREE R VALUE                     :  0.25942
#REMARK   3   FREE R VALUE TEST SET SIZE   (%) :  4.0
#REMARK   3   FREE R VALUE TEST SET COUNT      :   180
#REMARK   3
#REMARK   3  FIT IN THE HIGHEST RESOLUTION BIN.
#REMARK   3   TOTAL NUMBER OF BINS USED           :      20
#REMARK   3   BIN RESOLUTION RANGE HIGH           :    1.448
#REMARK   3   BIN RESOLUTION RANGE LOW            :    1.486
#REMARK   3   REFLECTION IN BIN     (WORKING SET) :      322
#REMARK   3   BIN COMPLETENESS (WORKING+TEST) (%) :    97.95
#REMARK   3   BIN R VALUE           (WORKING SET) :    0.562
#REMARK   3   BIN FREE R VALUE SET COUNT          :       12
#REMARK   3   BIN FREE R VALUE                    :    0.407
#REMARK   3
#REMARK   3  NUMBER OF NON-HYDROGEN ATOMS USED IN REFINEMENT.
#REMARK   3   ALL ATOMS                :      268
#REMARK   3
#REMARK   3  B VALUES.
#REMARK   3   FROM WILSON PLOT           (A**2) : NULL
#REMARK   3   MEAN B VALUE      (OVERALL, A**2) :  18.462
#REMARK   3   OVERALL ANISOTROPIC B VALUE.
#REMARK   3    B11 (A**2) :     4.72
#REMARK   3    B22 (A**2) :     4.72
#REMARK   3    B33 (A**2) :    -9.43
#REMARK   3    B12 (A**2) :     0.00
#REMARK   3    B13 (A**2) :     0.00
#REMARK   3    B23 (A**2) :     0.00
#REMARK   3
#REMARK   3  ESTIMATED OVERALL COORDINATE ERROR.
#REMARK   3   ESU BASED ON R VALUE                            (A):   0.024
#REMARK   3   ESU BASED ON FREE R VALUE                       (A):   0.020
#REMARK   3   ESU BASED ON MAXIMUM LIKELIHOOD                 (A):   0.058
#REMARK   3   ESU FOR B VALUES BASED ON MAXIMUM LIKELIHOOD (A**2):   3.421
#REMARK   3
#REMARK   3 CORRELATION COEFFICIENTS.
#REMARK   3   CORRELATION COEFFICIENT FO-FC      :   0.961
#REMARK   3   CORRELATION COEFFICIENT FO-FC FREE :   0.943
#REMARK   3
#REMARK   3  RMS DEVIATIONS FROM IDEAL VALUES        COUNT    RMS    WEIGHT
#REMARK   3   BOND LENGTHS REFINED ATOMS        (A):   255 ; 0.017 ; 0.022
#REMARK   3   BOND LENGTHS OTHERS               (A):   350 ; 0.014 ; 0.026
#REMARK   3   BOND ANGLES REFINED ATOMS   (DEGREES):   318 ; 1.840 ; 2.743
#REMARK   3   BOND ANGLES OTHERS          (DEGREES):   755 ; 5.762 ; 3.386
#REMARK   3   CHIRAL-CENTER RESTRAINTS       (A**3):    34 ; 0.069 ; 0.200
#REMARK   3   GENERAL PLANES REFINED ATOMS      (A):   274 ; 0.031 ; 0.029
#REMARK   3   GENERAL PLANES OTHERS             (A):    74 ; 0.019 ; 0.029
#REMARK   3
#REMARK   3  ISOTROPIC THERMAL FACTOR RESTRAINTS.     COUNT   RMS    WEIGHT
#REMARK   3   SIDE-CHAIN BOND REFINED ATOMS  (A**2):   255 ; 1.904 ; 1.897
#REMARK   3   SIDE-CHAIN BOND OTHER ATOMS  (A**2)  :   256 ; 1.904 ;******
#REMARK   3   SIDE-CHAIN ANGLE OTHER ATOMS (A**2)  :   319 ; 2.571 ; 2.837
#REMARK   3   LONG RANGE B REFINED ATOMS (A**2)    :   248 ; 3.397 ;******
#REMARK   3   LONG RANGE B OTHER ATOMS (A**2)      :   249 ; 3.390 ;******
#REMARK   3
#REMARK   3 ANISOTROPIC THERMAL FACTOR RESTRAINTS.    COUNT   RMS   WEIGHT
#REMARK   3   RIGID-BOND RESTRAINTS          (A**2):   255 ; 4.565 ; 3.000
#REMARK   3   SPHERICITY; BONDED ATOMS       (A**2):   256 ; 8.372 ; 5.000
#REMARK   3
#REMARK   3  NCS RESTRAINTS STATISTICS
#REMARK   3   NUMBER OF NCS GROUPS : NULL
#REMARK   3
#REMARK   3  TWIN DETAILS
#REMARK   3   NUMBER OF TWIN DOMAINS  :    2
#REMARK   3      TWIN DOMAIN   :    1
#REMARK   3      TWIN OPERATOR :  H,  K,  L
#REMARK   3      TWIN FRACTION : 0.557
#REMARK   3      TWIN DOMAIN   :    2
#REMARK   3      TWIN OPERATOR :  K,  H, -L
#REMARK   3      TWIN FRACTION : 0.443
#REMARK   3
#REMARK   3
#REMARK   3  TLS DETAILS
#REMARK   3   NUMBER OF TLS GROUPS  : NULL
#REMARK   3
#REMARK   3
#REMARK   3  BULK SOLVENT MODELLING.
#REMARK   3   METHOD USED :  MASK
#REMARK   3   PARAMETERS FOR MASK CALCULATION
#REMARK   3   VDW PROBE RADIUS   :   1.20
#REMARK   3   ION PROBE RADIUS   :   0.80
#REMARK   3   SHRINKAGE RADIUS   :   0.80
#REMARK   3
#REMARK   3  OTHER REFINEMENT REMARKS:
#REMARK   3  HYDROGENS HAVE BEEN ADDED IN THE RIDING POSITIONS
#REMARK   3  U VALUES      : REFINED INDIVIDUALLY
#REMARK   3
#LINKR        CAE ULN A   1                 NAB URG A   2                ULN-URG
#LINKR        CAA URG A   2                 NAC URK A   3                URG-URK
#LINKR        CAA URK A   3                 NAD URL A   4                URK-URL
#LINKR        CAC URL A   4                 NAB URY A   5                URL-URY
#LINKR        CAA URY A   5                 NAD URL A   6                URY-URL
#LINKR        CAC URL A   6                 NAB URG A   7                URL-URG
#LINKR        CAA URG A   7                 NAC URK A   8                URG-URK
#LINKR        CAA URK A   8                 NAD URL A   9                URK-URL
#LINKR        CAC URL A   9                 NAC URA A  10                URL-URA
#LINKR        CAB URA A  10                 NAD ULC A  11                URA-ULC
#LINKR        CAE ULN B   1                 NAB URG B   2                ULN-URG
#LINKR        CAA URG B   2                 NAC URK B   3                URG-URK
#LINKR        CAA URK B   3                 NAD URL B   4                URK-URL
#LINKR        CAC URL B   4                 NAB URY B   5                URL-URY
#LINKR        CAA URY B   5                 NAD URL B   6                URY-URL
#LINKR        CAC URL B   6                 NAB URG B   7                URL-URG
#LINKR        CAA URG B   7                 NAC URK B   8                URG-URK
#LINKR        CAA URK B   8                 NAD URL B   9                URK-URL
#LINKR        CAC URL B   9                 NAC URA B  10                URL-URA
#LINKR        CAB URA B  10                 NAD ULC B  11                URA-ULC
#CRYST1   34.088   34.088   37.906  90.00  90.00 120.00 P 63                     
#SCALE1      0.029336  0.016937  0.000000        0.00000                         
#SCALE2     -0.000000  0.033874  0.000000        0.00000                         
#SCALE3      0.000000 -0.000000  0.026381        0.00000                         
#HETATM    1  OAF ULN A   1      38.670  23.040  33.168  1.00 51.23           O
#ANISOU    1  OAF ULN A   1     6969   6993   5503   -228    674  -1837       O
#HETATM    2  CAJ ULN A   1      38.997  22.310  32.242  1.00 44.92           C
#ANISOU    2  CAJ ULN A   1     6153   6112   4800   -233    499   -900       C
#HETATM    3  NAH ULN A   1      40.137  22.519  31.578  1.00 50.01           N
#ANISOU    3  NAH ULN A   1     5866   7542   5591  -1003    221    -21       N
#HETATM    4  CAL ULN A   1      41.039  23.620  31.915  1.00 49.87           C
#ANISOU    4  CAL ULN A   1     6361   6419   6165   -320   -305     14       C
#HETATM    5  CAC ULN A   1      42.423  23.350  31.326  1.00 52.62           C
#ANISOU    5  CAC ULN A   1     6201   7382   6408   -453   -366   -103       C
#HETATM    6  CAD ULN A   1      40.453  24.945  31.420  1.00 52.40           C
#ANISOU    6  CAD ULN A   1     7309   6829   5768    132   -234    359       C
#HETATM    7  NAI ULN A   1      38.236  21.272  31.858  1.00 45.76           N
#ANISOU    7  NAI ULN A   1     5500   6098   5787   -463    234   -202       N
#HETATM    8  CAM ULN A   1      36.950  20.926  32.485  1.00 44.84           C
#ANISOU    8  CAM ULN A   1     5468   5649   5918     11    228    304       C
#HETATM    9  CAE ULN A   1      36.987  19.544  33.186  1.00 41.05           C
#ANISOU    9  CAE ULN A   1     4639   5467   5488    454    440     55       C
#HETATM   10  CAG ULN A   1      35.922  20.953  31.337  1.00 47.41           C
#ANISOU   10  CAG ULN A   1     6121   6095   5795     89     54    325       C
#HETATM   11  CAK ULN A   1      35.442  22.359  30.874  1.00 50.50           C
#ANISOU   11  CAK ULN A   1     7087   6068   6032    546    123     79       C
#HETATM   12  CAB ULN A   1      35.912  23.541  31.740  1.00 55.26           C
#ANISOU   12  CAB ULN A   1     7362   6199   7432    390   -175   -231       C
#HETATM   13  CAA ULN A   1      35.794  22.608  29.401  1.00 52.03           C
#ANISOU   13  CAA ULN A   1     7115   6830   5821    715   -280    175       C
#HETATM   14  OAD URG A   2      41.750  12.316  35.357  1.00 28.66           O
#ANISOU   14  OAD URG A   2     3973   4191   2723    543    225   -234       O
#HETATM   15  CAJ URG A   2      41.422  13.074  34.423  1.00 23.28           C
#ANISOU   15  CAJ URG A   2     2871   3182   2792     71    265   -432       C
#HETATM   16  OAE URG A   2      40.704  12.763  33.444  1.00 23.57           O
#ANISOU   16  OAE URG A   2     2084   3734   3136    266     97   -222       O
#HETATM   17  CAF URG A   2      41.945  14.484  34.487  1.00 24.10           C
#ANISOU   17  CAF URG A   2     2971   3131   3052     94    322   -203       C
#HETATM   18  CAG URG A   2      41.199  15.327  33.450  1.00 24.76           C
#ANISOU   18  CAG URG A   2     3458   2911   3039    -47    384    -43       C
#HETATM   19  CAK URG A   2      41.007  16.747  33.973  1.00 22.90           C
#ANISOU   19  CAK URG A   2     2927   2912   2862   -208    426   -169       C
#HETATM   20  CAA URG A   2      42.328  17.570  33.877  1.00 19.39           C
#ANISOU   20  CAA URG A   2     2709   2351   2307     38    415   -400       C
#HETATM   21  NAH URG A   2      40.019  17.442  33.140  1.00 28.44           N
#ANISOU   21  NAH URG A   2     3325   4092   3389    304   -176   -540       N
#HETATM   22  CAI URG A   2      38.962  18.091  33.654  1.00 31.10           C
#ANISOU   22  CAI URG A   2     3000   5244   3570     24    263   -579       C
#HETATM   23  OAC URG A   2      38.725  18.079  34.866  1.00 29.42           O
#ANISOU   23  OAC URG A   2     1882   5958   3336   -575   -328  -1177       O
#HETATM   24  NAB URG A   2      38.186  18.759  32.774  1.00 37.62           N
#ANISOU   24  NAB URG A   2     3913   5769   4610    194   -216   -134       N
#HETATM   25  NAB URK A   3      45.250  26.056  34.950  1.00 22.99           N
#ANISOU   25  NAB URK A   3     3147   2911   2676   -621    608   -135       N
#HETATM   26  CAE URK A   3      44.685  24.909  35.675  1.00 19.49           C
#ANISOU   26  CAE URK A   3     2462   2003   2937   -169    -66   -192       C
#HETATM   27  CAF URK A   3      43.261  24.616  35.194  1.00 17.42           C
#ANISOU   27  CAF URK A   3     2171   1894   2551   -286    397    -54       C
#HETATM   28  CAG URK A   3      42.849  23.204  35.627  1.00 15.64           C
#ANISOU   28  CAG URK A   3     1953   1906   2082   -229    255     -5       C
#HETATM   29  CAH URK A   3      41.330  23.176  35.859  1.00 14.45           C
#ANISOU   29  CAH URK A   3     1891   1683   1916   -130    103    191       C
#HETATM   30  CAK URK A   3      40.853  21.747  36.117  1.00 13.71           C
#ANISOU   30  CAK URK A   3     1655   1715   1838   -176     59    128       C
#HETATM   31  CAA URK A   3      39.308  21.748  36.400  1.00 12.54           C
#ANISOU   31  CAA URK A   3     1635   1456   1670   -119     38    205       C
#HETATM   32  NAI URK A   3      41.129  20.907  34.931  1.00 14.08           N
#ANISOU   32  NAI URK A   3     1782   1667   1898   -209     72     87       N
#HETATM   33  CAJ URK A   3      41.673  19.674  35.030  1.00 13.32           C
#ANISOU   33  CAJ URK A   3     1770   1619   1673   -297    225    220       C
#HETATM   34  OAD URK A   3      41.985  19.198  36.114  1.00 13.41           O
#ANISOU   34  OAD URK A   3     1825   1774   1496   -300     62    -33       O
#HETATM   35  NAC URK A   3      41.883  18.994  33.888  1.00 16.27           N
#ANISOU   35  NAC URK A   3     2214   2164   1802   -275    309      7       N
#HETATM   36  CAA URL A   4      35.237  16.558  39.804  1.00 13.30           C
#ANISOU   36  CAA URL A   4     1420   1714   1919    -88    -60     77       C
#HETATM   37  CAI URL A   4      36.434  17.498  39.684  1.00 12.16           C
#ANISOU   37  CAI URL A   4     1321   1576   1723     -1   -110     20       C
#HETATM   38  CAB URL A   4      36.638  18.216  41.020  1.00 12.94           C
#ANISOU   38  CAB URL A   4     1466   1681   1769    -32     -2    -70       C
#HETATM   39  CAF URL A   4      37.667  16.662  39.321  1.00 11.60           C
#ANISOU   39  CAF URL A   4     1363   1379   1662    -52    -94     -7       C
#HETATM   40  CAJ URL A   4      38.894  17.549  39.075  1.00 11.05           C
#ANISOU   40  CAJ URL A   4     1394   1352   1450    -46    -91     16       C
#HETATM   41  CAC URL A   4      40.137  16.630  38.851  1.00 11.60           C
#ANISOU   41  CAC URL A   4     1437   1309   1660    -63     25     11       C
#HETATM   42  NAG URL A   4      38.724  18.382  37.863  1.00 12.66           N
#ANISOU   42  NAG URL A   4     1752   1445   1612   -100    -89    167       N
#HETATM   43  CAH URL A   4      39.039  19.708  37.828  1.00 12.22           C
#ANISOU   43  CAH URL A   4     1741   1425   1476    -14    -81    100       C
#HETATM   44  OAE URL A   4      39.416  20.320  38.834  1.00 12.42           O
#ANISOU   44  OAE URL A   4     1819   1356   1545     93      5    -34       O
#HETATM   45  NAD URL A   4      38.895  20.329  36.637  1.00 12.15           N
#ANISOU   45  NAD URL A   4     1697   1352   1566     29      5    195       N
#HETATM   46  CAG URY A   5      46.820  20.734  40.266  1.00 13.57           C
#ANISOU   46  CAG URY A   5     1531   2014   1611    -69    114   -137       C
#HETATM   47  CAE URY A   5      47.639  21.702  40.841  1.00 14.07           C
#ANISOU   47  CAE URY A   5     1680   1918   1745   -205    165    -62       C
#HETATM   48  CAL URY A   5      47.704  22.982  40.296  1.00 10.69           C
#ANISOU   48  CAL URY A   5      973   1494   1592   -679   -315   -495       C
#HETATM   49  OAD URY A   5      48.507  23.921  40.864  1.00 15.02           O
#ANISOU   49  OAD URY A   5     1492   1587   2626   -772   -333   -637       O
#HETATM   50  CAF URY A   5      46.947  23.298  39.166  1.00 13.45           C
#ANISOU   50  CAF URY A   5     1582   1662   1864   -240   -303      5       C
#HETATM   51  CAH URY A   5      46.133  22.328  38.583  1.00 12.91           C
#ANISOU   51  CAH URY A   5     1459   1722   1723   -154   -189    -20       C
#HETATM   52  CAM URY A   5      46.062  21.047  39.138  1.00 12.38           C
#ANISOU   52  CAM URY A   5     1367   1735   1601    -65    237    -13       C
#HETATM   53  CAI URY A   5      45.178  20.007  38.515  1.00 12.25           C
#ANISOU   53  CAI URY A   5     1395   1718   1539      8    180    -53       C
#HETATM   54  CAN URY A   5      43.858  19.883  39.295  1.00 11.20           C
#ANISOU   54  CAN URY A   5     1316   1444   1494     15     87      1       C
#HETATM   55  CAA URY A   5      43.176  21.286  39.415  1.00 10.40           C
#ANISOU   55  CAA URY A   5     1282   1375   1292    -61    103    -24       C
#HETATM   56  NAJ URY A   5      42.938  19.011  38.560  1.00 11.32           N
#ANISOU   56  NAJ URY A   5     1400   1517   1382    -31    117    -52       N
#HETATM   57  CAK URY A   5      42.063  18.189  39.171  1.00 10.69           C
#ANISOU   57  CAK URY A   5     1497   1296   1268    -42     45   -109       C
#HETATM   58  OAC URY A   5      42.034  18.055  40.404  1.00 11.68           O
#ANISOU   58  OAC URY A   5     1507   1608   1322   -198     21     15       O
#HETATM   59  NAB URY A   5      41.246  17.492  38.357  1.00 10.67           N
#ANISOU   59  NAB URY A   5     1391   1333   1328    -37    -12    -22       N
#HETATM   60  CAA URL A   6      37.496  23.799  43.609  1.00 13.36           C
#ANISOU   60  CAA URL A   6     1324   1590   2160     98     79   -116       C
#HETATM   61  CAI URL A   6      38.789  23.109  43.184  1.00 11.71           C
#ANISOU   61  CAI URL A   6     1346   1339   1763     68     74    -28       C
#HETATM   62  CAB URL A   6      39.959  23.720  43.959  1.00 12.31           C
#ANISOU   62  CAB URL A   6     1473   1354   1848    116    127   -393       C
#HETATM   63  CAF URL A   6      38.662  21.614  43.475  1.00 10.38           C
#ANISOU   63  CAF URL A   6     1116   1295   1530     46     42   -121       C
#HETATM   64  CAJ URL A   6      39.957  20.843  43.144  1.00  9.36           C
#ANISOU   64  CAJ URL A   6     1047   1189   1320    -15      7    -55       C
#HETATM   65  CAC URL A   6      39.735  19.344  43.476  1.00  9.46           C
#ANISOU   65  CAC URL A   6     1104   1194   1294    -18     15    -52       C
#HETATM   66  NAG URL A   6      40.298  20.956  41.713  1.00  9.51           N
#ANISOU   66  NAG URL A   6     1032   1241   1340     17      4     35       N
#HETATM   67  CAH URL A   6      41.574  21.137  41.307  1.00  9.33           C
#ANISOU   67  CAH URL A   6     1060   1234   1250    -16     -4     86       C
#HETATM   68  OAE URL A   6      42.492  21.268  42.119  1.00  9.63           O
#ANISOU   68  OAE URL A   6     1073   1234   1351   -119    -20   -185       O
#HETATM   69  NAD URL A   6      41.802  21.162  39.981  1.00 10.03           N
#ANISOU   69  NAD URL A   6     1208   1337   1265    -78     -3     49       N
#HETATM   70  OAD URG A   7      44.570  13.119  45.043  1.00 18.73           O
#ANISOU   70  OAD URG A   7     2878   2336   1903    196     28    333       O
#HETATM   71  CAJ URG A   7      44.446  13.890  44.065  1.00 15.20           C
#ANISOU   71  CAJ URG A   7     2277   1689   1806    231    120     38       C
#HETATM   72  OAE URG A   7      44.583  13.568  42.870  1.00 19.78           O
#ANISOU   72  OAE URG A   7     3142   2523   1848    283    284    -85       O
#HETATM   73  CAF URG A   7      44.045  15.323  44.362  1.00 13.42           C
#ANISOU   73  CAF URG A   7     1775   1558   1766    -14    159     25       C
#HETATM   74  CAG URG A   7      44.964  16.270  43.563  1.00 12.06           C
#ANISOU   74  CAG URG A   7     1503   1285   1791     67      0    -10       C
#HETATM   75  CAK URG A   7      44.474  17.727  43.662  1.00 10.56           C
#ANISOU   75  CAK URG A   7     1254   1327   1429     96    -10    -28       C
#HETATM   76  CAA URG A   7      45.450  18.660  42.873  1.00 10.55           C
#ANISOU   76  CAA URG A   7     1359   1261   1386     91    -53      4       C
#HETATM   77  NAH URG A   7      43.132  17.875  43.064  1.00 10.44           N
#ANISOU   77  NAH URG A   7     1246   1427   1294     70     18    -40       N
#HETATM   78  CAI URG A   7      42.102  18.511  43.689  1.00  9.61           C
#ANISOU   78  CAI URG A   7     1113   1372   1165    -46    -35    -52       C
#HETATM   79  OAC URG A   7      42.210  18.965  44.834  1.00  9.96           O
#ANISOU   79  OAC URG A   7     1082   1435   1264     89      0   -195       O
#HETATM   80  NAB URG A   7      40.946  18.611  42.988  1.00  9.59           N
#ANISOU   80  NAB URG A   7     1100   1288   1253     61    -30     -5       N
#HETATM   81  NAB URK A   8      47.198  28.035  42.041  1.00 21.03           N
#ANISOU   81  NAB URK A   8     2878   1852   3258     53     24    203       N
#HETATM   82  CAE URK A   8      47.021  26.584  42.220  1.00 15.18           C
#ANISOU   82  CAE URK A   8     1998   1865   1904    -92     91    115       C
#HETATM   83  CAF URK A   8      46.025  26.307  43.340  1.00 13.22           C
#ANISOU   83  CAF URK A   8     1597   1480   1944     -2     -5     77       C
#HETATM   84  CAG URK A   8      45.888  24.802  43.554  1.00 11.83           C
#ANISOU   84  CAG URK A   8     1358   1455   1681    -98    119    -67       C
#HETATM   85  CAH URK A   8      44.570  24.523  44.272  1.00 10.57           C
#ANISOU   85  CAH URK A   8     1177   1202   1634    -60    -50     -2       C
#HETATM   86  CAK URK A   8      44.574  23.117  44.875  1.00  9.43           C
#ANISOU   86  CAK URK A   8      997   1242   1342     -3     31     15       C
#HETATM   87  CAA URK A   8      43.301  22.958  45.777  1.00  9.47           C
#ANISOU   87  CAA URK A   8     1117   1160   1321     99    123    -28       C
#HETATM   88  NAI URK A   8      44.469  22.093  43.834  1.00  9.73           N
#ANISOU   88  NAI URK A   8     1114   1203   1379    -32     31     22       N
#HETATM   89  CAJ URK A   8      45.159  20.926  43.878  1.00  9.18           C
#ANISOU   89  CAJ URK A   8     1055   1278   1154     12     53     57       C
#HETATM   90  OAD URK A   8      46.012  20.695  44.743  1.00 10.43           O
#ANISOU   90  OAD URK A   8      982   1646   1333   -118    -54     11       O
#HETATM   91  NAC URK A   8      44.885  20.040  42.911  1.00  9.98           N
#ANISOU   91  NAC URK A   8     1214   1283   1294     85    -49      1       N
#HETATM   92  CAA URL A   9      41.301  16.991  50.003  1.00 11.95           C
#ANISOU   92  CAA URL A   9     1264   1533   1742   -125    270    -58       C
#HETATM   93  CAI URL A   9      42.066  18.209  49.482  1.00 11.36           C
#ANISOU   93  CAI URL A   9     1303   1342   1669     22    123     29       C
#HETATM   94  CAB URL A   9      42.255  19.213  50.630  1.00 11.99           C
#ANISOU   94  CAB URL A   9     1332   1614   1609    -42    247    -74       C
#HETATM   95  CAF URL A   9      43.422  17.735  48.946  1.00 10.63           C
#ANISOU   95  CAF URL A   9     1247   1304   1484     67      0    101       C
#HETATM   96  CAJ URL A   9      44.271  18.899  48.443  1.00 10.30           C
#ANISOU   96  CAJ URL A   9     1209   1382   1320     42     30     64       C
#HETATM   97  CAC URL A   9      45.608  18.322  47.898  1.00 11.68           C
#ANISOU   97  CAC URL A   9     1256   1495   1687    105     60      0       C
#HETATM   98  NAG URL A   9      43.586  19.618  47.346  1.00  9.58           N
#ANISOU   98  NAG URL A   9     1109   1204   1327    -12     29     29       N
#HETATM   99  CAH URL A   9      43.726  20.954  47.182  1.00  8.67           C
#ANISOU   99  CAH URL A   9      935   1156   1201    119     83    -56       C
#HETATM  100  OAE URL A   9      44.392  21.631  47.965  1.00  9.59           O
#ANISOU  100  OAE URL A   9     1130   1302   1212     84     22   -121       O
#HETATM  101  NAD URL A   9      43.116  21.516  46.126  1.00  9.02           N
#ANISOU  101  NAD URL A   9     1004   1157   1264    177     91    -28       N
#HETATM  102  CAA URA A  10      49.866  22.359  46.858  1.00 16.33           C
#ANISOU  102  CAA URA A  10     1754   2651   1798   -126    234     78       C
#HETATM  103  CAG URA A  10      48.532  22.338  47.585  1.00 14.29           C
#ANISOU  103  CAG URA A  10     1518   1982   1928    -26     50   -156       C
#HETATM  104  CAB URA A  10      47.775  23.684  47.375  1.00 14.67           C
#ANISOU  104  CAB URA A  10     1724   1971   1876    -60    -13      7       C
#HETATM  105  NAE URA A  10      47.696  21.250  47.051  1.00 13.18           N
#ANISOU  105  NAE URA A  10     1525   1766   1717     46     62      5       N
#HETATM  106  CAF URA A  10      47.134  20.299  47.826  1.00 11.60           C
#ANISOU  106  CAF URA A  10     1159   1731   1516     99     57   -126       C
#HETATM  107  OAD URA A  10      47.304  20.257  49.050  1.00 14.43           O
#ANISOU  107  OAD URA A  10     1402   2471   1607    -83   -185    -58       O
#HETATM  108  NAC URA A  10      46.367  19.397  47.190  1.00 11.52           N
#ANISOU  108  NAC URA A  10     1366   1492   1518     79     12     -4       N
#HETATM  109  CAA ULC A  11      41.482  23.251  52.038  1.00 17.29           C
#ANISOU  109  CAA ULC A  11     1841   2338   2390    -32    151    -43       C
#HETATM  110  CAM ULC A  11      42.795  23.720  51.421  1.00 15.41           C
#ANISOU  110  CAM ULC A  11     1821   2062   1972     -5     42   -146       C
#HETATM  111  CAB ULC A  11      42.962  25.221  51.656  1.00 16.54           C
#ANISOU  111  CAB ULC A  11     1924   2089   2268    -61    130   -149       C
#HETATM  112  CAH ULC A  11      43.943  22.953  52.076  1.00 16.25           C
#ANISOU  112  CAH ULC A  11     1947   2368   1856     16    -67    -85       C
#HETATM  113  CAN ULC A  11      45.298  23.489  51.602  1.00 16.76           C
#ANISOU  113  CAN ULC A  11     1945   2575   1847    145     73    -71       C
#HETATM  114  NAJ ULC A  11      45.408  23.338  50.140  1.00 16.14           N
#ANISOU  114  NAJ ULC A  11     1596   2707   1826     85    -44   -149       N
#HETATM  115  CAL ULC A  11      46.520  23.686  49.495  1.00 15.68           C
#ANISOU  115  CAL ULC A  11     1697   2468   1793   -110    -90   -105       C
#HETATM  116  OAF ULC A  11      47.488  24.159  50.100  1.00 17.99           O
#ANISOU  116  OAF ULC A  11     1613   3011   2210   -300    -74   -296       O
#HETATM  117  NAD ULC A  11      46.536  23.513  48.168  1.00 14.35           N
#ANISOU  117  NAD ULC A  11     1495   2160   1797   -112   -184   -101       N
#HETATM  118  CAG ULC A  11      46.401  22.702  52.295  1.00 16.75           C
#ANISOU  118  CAG ULC A  11     2135   2368   1862     99     76    111       C
#HETATM  119  NAI ULC A  11      46.466  21.354  51.690  1.00 16.54           N
#ANISOU  119  NAI ULC A  11     2054   2357   1872    218    152     70       N
#HETATM  120  CAK ULC A  11      45.954  20.263  52.275  1.00 16.59           C
#ANISOU  120  CAK ULC A  11     2049   2275   1977    181      9     81       C
#HETATM  121  OAE ULC A  11      45.385  20.321  53.364  1.00 20.56           O
#ANISOU  121  OAE ULC A  11     2598   3039   2173    -20    351    268       O
#HETATM  122  NAC ULC A  11      46.076  19.109  51.624  1.00 17.40           N
#ANISOU  122  NAC ULC A  11     2396   2331   1882    255     55    136       N
#HETATM  123  OAF ULN B   1      39.284  23.899  60.662  1.00 70.41           O
#ANISOU  123  OAF ULN B   1     9360  11587   5803  -1297  -1086   1652       O
#HETATM  124  CAJ ULN B   1      38.532  23.663  61.599  1.00 66.91           C
#ANISOU  124  CAJ ULN B   1     7897  10025   7498   -839   -284    418       C
#HETATM  125  NAH ULN B   1      38.863  23.995  62.850  1.00 69.98           N
#ANISOU  125  NAH ULN B   1     8705   9455   8428  -1095  -1331   -108       N
#HETATM  126  CAL ULN B   1      40.120  24.665  63.164  1.00 67.49           C
#ANISOU  126  CAL ULN B   1     8802   8167   8672   -638  -1779   -423       C
#HETATM  127  CAC ULN B   1      39.982  26.151  62.863  1.00 73.19           C
#ANISOU  127  CAC ULN B   1     9950   7966   9891   -742  -2026   -689       C
#HETATM  128  CAD ULN B   1      40.493  24.402  64.624  1.00 67.14           C
#ANISOU  128  CAD ULN B   1     8851   8256   8401  -1528  -1876   -923       C
#HETATM  129  NAI ULN B   1      37.355  23.044  61.416  1.00 61.45           N
#ANISOU  129  NAI ULN B   1     7438   9065   6842    -57   -501    108       N
#HETATM  130  CAM ULN B   1      36.885  22.602  60.100  1.00 51.88           C
#ANISOU  130  CAM ULN B   1     6300   6678   6731    488    -50    213       C
#HETATM  131  CAE ULN B   1      35.366  22.838  59.960  1.00 47.38           C
#ANISOU  131  CAE ULN B   1     6255   5220   6527    756    535    244       C
#HETATM  132  CAG ULN B   1      37.230  21.104  59.991  1.00 53.81           C
#ANISOU  132  CAG ULN B   1     6768   6593   7084    280   -220   -141       C
#HETATM  133  CAK ULN B   1      38.599  20.740  60.601  1.00 52.20           C
#ANISOU  133  CAK ULN B   1     6801   6681   6349    112   -254   -284       C
#HETATM  134  CAB ULN B   1      38.618  19.303  61.122  1.00 54.70           C
#ANISOU  134  CAB ULN B   1     7758   6430   6596   -486  -1084   -567       C
#HETATM  135  CAA ULN B   1      39.737  20.988  59.606  1.00 53.55           C
#ANISOU  135  CAA ULN B   1     6651   7241   6454   -151   -387    358       C
#HETATM  136  OAD URG B   2      31.534  27.802  56.985  1.00 22.28           O
#ANISOU  136  OAD URG B   2     3536   3028   1899  -1976    194  -1290       O
#HETATM  137  CAJ URG B   2      32.115  28.693  57.639  1.00 17.53           C
#ANISOU  137  CAJ URG B   2     1904   2487   2267  -1105    603  -2040       C
#HETATM  138  OAE URG B   2      31.623  29.343  58.587  1.00 29.48           O
#ANISOU  138  OAE URG B   2     4760   3593   2847   1843    455  -1742       O
#HETATM  139  CAF URG B   2      33.543  28.972  57.296  1.00 22.75           C
#ANISOU  139  CAF URG B   2     2137   3105   3402   -793    760   -410       C
#HETATM  140  CAG URG B   2      34.386  28.688  58.556  1.00 25.94           C
#ANISOU  140  CAG URG B   2     3669   2743   3445   -204    118   -777       C
#HETATM  141  CAK URG B   2      35.318  27.480  58.320  1.00 26.19           C
#ANISOU  141  CAK URG B   2     3280   3454   3217    182    348   -276       C
#HETATM  142  CAA URG B   2      36.799  27.915  58.427  1.00 23.64           C
#ANISOU  142  CAA URG B   2     3325   3032   2623    173    140   -390       C
#HETATM  143  NAH URG B   2      35.096  26.453  59.351  1.00 30.36           N
#ANISOU  143  NAH URG B   2     4021   3841   3672    395   1328    -12       N
#HETATM  144  CAI URG B   2      35.284  25.145  59.098  1.00 35.67           C
#ANISOU  144  CAI URG B   2     4873   3988   4692    458   1565   -273       C
#HETATM  145  OAC URG B   2      35.598  24.749  57.976  1.00 37.09           O
#ANISOU  145  OAC URG B   2     6232   3205   4654    111   2044     59       O
#HETATM  146  NAB URG B   2      35.112  24.294  60.113  1.00 41.16           N
#ANISOU  146  NAB URG B   2     5534   5131   4973    720   1559    358       N
#HETATM  147  NAB URK B   3      45.067  25.280  57.190  1.00 28.71           N
#ANISOU  147  NAB URK B   3     2484   4434   3988    314    277     -9       N
#HETATM  148  CAE URK B   3      43.655  25.670  57.289  1.00 24.09           C
#ANISOU  148  CAE URK B   3     2450   3774   2929    174    355   -489       C
#HETATM  149  CAF URK B   3      42.832  24.989  56.198  1.00 24.02           C
#ANISOU  149  CAF URK B   3     2425   3777   2923    -11    181   -132       C
#HETATM  150  CAG URK B   3      41.340  25.183  56.482  1.00 21.70           C
#ANISOU  150  CAG URK B   3     2405   2985   2855    150     -4    -62       C
#HETATM  151  CAH URK B   3      40.565  23.884  56.177  1.00 20.57           C
#ANISOU  151  CAH URK B   3     1971   3011   2830    130    -93    184       C
#HETATM  152  CAK URK B   3      39.069  24.215  56.057  1.00 17.51           C
#ANISOU  152  CAK URK B   3     1998   2484   2167    166   -167    309       C
#HETATM  153  CAA URK B   3      38.215  22.921  55.879  1.00 15.70           C
#ANISOU  153  CAA URK B   3     1782   2367   1815    297   -110    298       C
#HETATM  154  NAI URK B   3      38.650  24.935  57.276  1.00 17.62           N
#ANISOU  154  NAI URK B   3     1877   2612   2204   -126   -240     87       N
#HETATM  155  CAJ URK B   3      37.968  26.092  57.215  1.00 17.88           C
#ANISOU  155  CAJ URK B   3     1916   2625   2250   -156    -42     67       C
#HETATM  156  OAD URK B   3      37.642  26.587  56.138  1.00 18.95           O
#ANISOU  156  OAD URK B   3     2285   3106   1806   -485    488    200       O
#HETATM  157  NAC URK B   3      37.636  26.679  58.377  1.00 20.12           N
#ANISOU  157  NAC URK B   3     2588   2811   2243   -184   -260   -187       N
#HETATM  158  CAA URL B   4      31.783  22.243  52.411  1.00 12.74           C
#ANISOU  158  CAA URL B   4     1538   1493   1809    -62     83    124       C
#HETATM  159  CAI URL B   4      33.194  22.819  52.548  1.00 12.00           C
#ANISOU  159  CAI URL B   4     1418   1500   1639     71     34    148       C
#HETATM  160  CAB URL B   4      33.938  22.646  51.218  1.00 12.53           C
#ANISOU  160  CAB URL B   4     1508   1669   1584    -21     47    204       C
#HETATM  161  CAF URL B   4      33.079  24.300  52.917  1.00 11.80           C
#ANISOU  161  CAF URL B   4     1372   1485   1624     61     40    154       C
#HETATM  162  CAJ URL B   4      34.447  24.913  53.224  1.00 12.07           C
#ANISOU  162  CAJ URL B   4     1424   1531   1630    -18     75    161       C
#HETATM  163  CAC URL B   4      34.257  26.428  53.520  1.00 12.39           C
#ANISOU  163  CAC URL B   4     1386   1601   1722    103     46     86       C
#HETATM  164  NAG URL B   4      35.059  24.282  54.419  1.00 12.81           N
#ANISOU  164  NAG URL B   4     1411   1797   1657     24     25    191       N
#HETATM  165  CAH URL B   4      36.354  23.861  54.453  1.00 12.80           C
#ANISOU  165  CAH URL B   4     1547   1771   1545    179     25    256       C
#HETATM  166  OAE URL B   4      37.088  23.930  53.459  1.00 13.53           O
#ANISOU  166  OAE URL B   4     1563   1932   1646    392    108    158       O
#HETATM  167  NAD URL B   4      36.796  23.345  55.635  1.00 13.56           N
#ANISOU  167  NAD URL B   4     1763   1832   1556    270     46    304       N
#HETATM  168  CAG URY B   5      41.014  30.286  52.139  1.00 14.57           C
#ANISOU  168  CAG URY B   5     1787   1936   1812   -183   -126   -104       C
#HETATM  169  CAE URY B   5      42.243  30.566  51.541  1.00 16.13           C
#ANISOU  169  CAE URY B   5     1839   2362   1924   -380   -148   -211       C
#HETATM  170  CAL URY B   5      43.412  30.010  52.052  1.00 17.22           C
#ANISOU  170  CAL URY B   5     1945   2525   2071   -151     14    -43       C
#HETATM  171  OAD URY B   5      44.612  30.287  51.469  1.00 21.59           O
#ANISOU  171  OAD URY B   5     2176   3415   2612   -253    338      3       O
#HETATM  172  CAF URY B   5      43.356  29.174  53.167  1.00 16.87           C
#ANISOU  172  CAF URY B   5     1817   2326   2265   -278     88     20       C
#HETATM  173  CAH URY B   5      42.130  28.898  53.769  1.00 14.57           C
#ANISOU  173  CAH URY B   5     1784   1928   1824    -41     30     53       C
#HETATM  174  CAM URY B   5      40.955  29.448  53.250  1.00 13.68           C
#ANISOU  174  CAM URY B   5     1676   1872   1648   -180    -80   -243       C
#HETATM  175  CAI URY B   5      39.637  29.140  53.897  1.00 13.00           C
#ANISOU  175  CAI URY B   5     1617   1528   1791      2    -27   -240       C
#HETATM  176  CAN URY B   5      38.892  28.062  53.103  1.00 12.76           C
#ANISOU  176  CAN URY B   5     1553   1497   1797    -48     -4   -155       C
#HETATM  177  CAA URY B   5      39.781  26.783  52.969  1.00 12.00           C
#ANISOU  177  CAA URY B   5     1475   1443   1639    -95    -88   -192       C
#HETATM  178  NAJ URY B   5      37.699  27.654  53.828  1.00 13.08           N
#ANISOU  178  NAJ URY B   5     1537   1725   1705    -80     24   -351       N
#HETATM  179  CAK URY B   5      36.542  27.360  53.219  1.00 12.05           C
#ANISOU  179  CAK URY B   5     1411   1703   1461     10    114   -150       C
#HETATM  180  OAC URY B   5      36.383  27.496  51.997  1.00 11.69           O
#ANISOU  180  OAC URY B   5     1435   1561   1444   -184    176   -162       O
#HETATM  181  NAB URY B   5      35.557  26.933  54.026  1.00 12.12           N
#ANISOU  181  NAB URY B   5     1472   1696   1434     36     77     33       N
#HETATM  182  CAA URL B   6      39.144  20.714  48.360  1.00 11.93           C
#ANISOU  182  CAA URL B   6     1649   1185   1696     10    131     -6       C
#HETATM  183  CAI URL B   6      39.205  22.106  48.989  1.00 10.63           C
#ANISOU  183  CAI URL B   6     1328   1196   1515     -2    -19     14       C
#HETATM  184  CAB URL B   6      40.321  22.917  48.313  1.00 11.93           C
#ANISOU  184  CAB URL B   6     1365   1391   1776     43    209     -2       C
#HETATM  185  CAF URL B   6      37.833  22.771  48.798  1.00 10.35           C
#ANISOU  185  CAF URL B   6     1326   1134   1471      4     56      4       C
#HETATM  186  CAJ URL B   6      37.829  24.272  49.163  1.00 10.09           C
#ANISOU  186  CAJ URL B   6     1280   1163   1391     -8    -34    -45       C
#HETATM  187  CAC URL B   6      36.417  24.843  48.822  1.00  9.84           C
#ANISOU  187  CAC URL B   6     1208   1108   1421    -12    122     20       C
#HETATM  188  NAG URL B   6      38.088  24.486  50.604  1.00 10.37           N
#ANISOU  188  NAG URL B   6     1380   1195   1364     29    -34     61       N
#HETATM  189  CAH URL B   6      38.868  25.505  51.044  1.00 10.49           C
#ANISOU  189  CAH URL B   6     1276   1270   1439     62    -62     -3       C
#HETATM  190  OAE URL B   6      39.444  26.260  50.258  1.00 11.36           O
#ANISOU  190  OAE URL B   6     1575   1250   1489    106     58      6       O
#HETATM  191  NAD URL B   6      38.994  25.657  52.374  1.00 10.97           N
#ANISOU  191  NAD URL B   6     1213   1445   1508    -20   -110   -116       N
#HETATM  192  OAD URG B   7      33.210  32.007  47.353  1.00 18.07           O
#ANISOU  192  OAD URG B   7     2120   2589   2157    249   -344     20       O
#HETATM  193  CAJ URG B   7      33.931  31.689  48.326  1.00 15.33           C
#ANISOU  193  CAJ URG B   7     2012   1870   1940    272   -102     36       C
#HETATM  194  OAE URG B   7      33.888  32.205  49.464  1.00 19.73           O
#ANISOU  194  OAE URG B   7     2817   2630   2047    339    -98   -174       O
#HETATM  195  CAF URG B   7      34.918  30.561  48.111  1.00 13.65           C
#ANISOU  195  CAF URG B   7     1740   1623   1822     33   -104      8       C
#HETATM  196  CAG URG B   7      36.188  30.880  48.907  1.00 12.02           C
#ANISOU  196  CAG URG B   7     1599   1295   1671     97     23     10       C
#HETATM  197  CAK URG B   7      37.228  29.773  48.725  1.00 10.69           C
#ANISOU  197  CAK URG B   7     1349   1288   1424    -44     68    -49       C
#HETATM  198  CAA URG B   7      38.533  30.181  49.478  1.00 10.85           C
#ANISOU  198  CAA URG B   7     1384   1223   1516    -23      0    -64       C
#HETATM  199  NAH URG B   7      36.739  28.501  49.307  1.00 10.05           N
#ANISOU  199  NAH URG B   7     1213   1222   1381      2     19   -102       N
#HETATM  200  CAI URG B   7      36.795  27.308  48.658  1.00  9.73           C
#ANISOU  200  CAI URG B   7     1222   1169   1302    -51     87    -11       C
#HETATM  201  OAC URG B   7      37.215  27.202  47.498  1.00  9.42           O
#ANISOU  201  OAC URG B   7     1246   1101   1231     88    -45    -86       O
#HETATM  202  NAB URG B   7      36.358  26.239  49.352  1.00  9.83           N
#ANISOU  202  NAB URG B   7     1212   1115   1407    -15     10     22       N
#HETATM  203  NAB URK B   8      47.812  27.677  49.182  1.00 23.44           N
#ANISOU  203  NAB URK B   8     1766   2998   4142   -255    108    141       N
#HETATM  204  CAE URK B   8      46.430  28.131  49.389  1.00 17.51           C
#ANISOU  204  CAE URK B   8     1982   1690   2981    -58   -156    -29       C
#HETATM  205  CAF URK B   8      45.458  27.119  48.808  1.00 15.85           C
#ANISOU  205  CAF URK B   8     1699   1866   2454      8    -22    -95       C
#HETATM  206  CAG URK B   8      44.123  27.778  48.466  1.00 13.01           C
#ANISOU  206  CAG URK B   8     1615   1436   1890   -191     41   -113       C
#HETATM  207  CAH URK B   8      43.222  26.706  47.857  1.00 11.68           C
#ANISOU  207  CAH URK B   8     1373   1366   1697    -53    -78     23       C
#HETATM  208  CAK URK B   8      41.940  27.319  47.316  1.00 10.75           C
#ANISOU  208  CAK URK B   8     1294   1294   1497    -55     28    -36       C
#HETATM  209  CAA URK B   8      41.184  26.244  46.459  1.00  9.85           C
#ANISOU  209  CAA URK B   8     1182   1153   1406     58     74    -15       C
#HETATM  210  NAI URK B   8      41.028  27.695  48.401  1.00 10.32           N
#ANISOU  210  NAI URK B   8     1298   1261   1358    -44    -61    -36       N
#HETATM  211  CAJ URK B   8      40.339  28.857  48.399  1.00 10.23           C
#ANISOU  211  CAJ URK B   8     1469   1213   1202    -32    -69   -129       C
#HETATM  212  OAD URK B   8      40.525  29.728  47.543  1.00 11.62           O
#ANISOU  212  OAD URK B   8     1643   1251   1518   -172    123    -56       O
#HETATM  213  NAC URK B   8      39.461  29.025  49.397  1.00 10.77           N
#ANISOU  213  NAC URK B   8     1393   1172   1526    -72     58   -136       N
#HETATM  214  CAA URL B   9      34.909  27.309  42.401  1.00 10.07           C
#ANISOU  214  CAA URL B   9     1211   1196   1419   -191   -140    -75       C
#HETATM  215  CAI URL B   9      36.363  27.439  42.855  1.00 10.01           C
#ANISOU  215  CAI URL B   9     1149   1130   1524   -101    -80     -5       C
#HETATM  216  CAB URL B   9      37.301  27.206  41.656  1.00 10.61           C
#ANISOU  216  CAB URL B   9     1308   1195   1526   -162    -49   -182       C
#HETATM  217  CAF URL B   9      36.569  28.835  43.431  1.00  9.70           C
#ANISOU  217  CAF URL B   9     1149   1212   1323    -95   -103    -60       C
#HETATM  218  CAJ URL B   9      38.020  29.051  43.873  1.00  9.25           C
#ANISOU  218  CAJ URL B   9     1103   1167   1245    -80    -27    -10       C
#HETATM  219  CAC URL B   9      38.158  30.503  44.412  1.00 10.17           C
#ANISOU  219  CAC URL B   9     1207   1156   1501   -153    -48    -18       C
#HETATM  220  NAG URL B   9      38.376  28.126  44.963  1.00  9.53           N
#ANISOU  220  NAG URL B   9     1153   1193   1273    -97    -61     16       N
#HETATM  221  CAH URL B   9      39.608  27.586  45.072  1.00  9.29           C
#ANISOU  221  CAH URL B   9     1116   1230   1181   -117     28     40       C
#HETATM  222  OAE URL B   9      40.483  27.786  44.222  1.00 10.07           O
#ANISOU  222  OAE URL B   9     1346   1435   1045   -256     68     -7       O
#HETATM  223  NAD URL B   9      39.833  26.789  46.134  1.00  8.93           N
#ANISOU  223  NAD URL B   9     1153   1060   1179    -90    -63    -49       N
#HETATM  224  CAA URA B  10      43.890  32.164  45.221  1.00 15.49           C
#ANISOU  224  CAA URA B  10     1851   1870   2164   -374   -141   -175       C
#HETATM  225  CAG URA B  10      43.120  31.076  44.487  1.00 13.42           C
#ANISOU  225  CAG URA B  10     1614   1767   1715   -300    -72    -65       C
#HETATM  226  CAB URA B  10      43.882  29.724  44.587  1.00 13.55           C
#ANISOU  226  CAB URA B  10     1555   1806   1786   -282     20   -107       C
#HETATM  227  NAE URA B  10      41.784  30.909  45.102  1.00 13.75           N
#ANISOU  227  NAE URA B  10     1574   1857   1791   -230   -126     85       N
#HETATM  228  CAF URA B  10      40.642  30.856  44.371  1.00 11.18           C
#ANISOU  228  CAF URA B  10     1432   1361   1454   -323     81    -97       C
#HETATM  229  OAD URA B  10      40.649  30.978  43.140  1.00 12.88           O
#ANISOU  229  OAD URA B  10     1945   1412   1535   -562   -150    193       O
#HETATM  230  NAC URA B  10      39.495  30.661  45.061  1.00 10.52           N
#ANISOU  230  NAC URA B  10     1246   1316   1433   -206    -51    -24       N
#HETATM  231  CAA ULC B  11      40.197  24.504  39.918  1.00 15.89           C
#ANISOU  231  CAA ULC B  11     2017   1605   2415     96     65   -186       C
#HETATM  232  CAM ULC B  11      41.218  25.432  40.568  1.00 14.32           C
#ANISOU  232  CAM ULC B  11     1713   1710   2015     81    192    -18       C
#HETATM  233  CAB ULC B  11      42.623  24.884  40.307  1.00 15.52           C
#ANISOU  233  CAB ULC B  11     1644   1788   2465     17    151    -95       C
#HETATM  234  CAH ULC B  11      41.055  26.831  39.957  1.00 13.70           C
#ANISOU  234  CAH ULC B  11     1960   1711   1531    -49    242   -105       C
#HETATM  235  CAN ULC B  11      42.181  27.779  40.389  1.00 14.78           C
#ANISOU  235  CAN ULC B  11     1935   1942   1735   -139    209    -16       C
#HETATM  236  NAJ ULC B  11      42.194  27.929  41.854  1.00 14.60           N
#ANISOU  236  NAJ ULC B  11     2029   1752   1765   -267     65   -176       N
#HETATM  237  CAL ULC B  11      43.117  28.692  42.468  1.00 14.42           C
#ANISOU  237  CAL ULC B  11     1735   2017   1727   -281    113    -50       C
#HETATM  238  OAF ULC B  11      43.994  29.276  41.826  1.00 17.30           O
#ANISOU  238  OAF ULC B  11     1889   2369   2312   -462    234    170       O
#HETATM  239  NAD ULC B  11      43.054  28.773  43.805  1.00 14.37           N
#ANISOU  239  NAD ULC B  11     1825   1907   1725   -516     56    -43       N
#HETATM  240  CAG ULC B  11      41.936  29.123  39.724  1.00 16.21           C
#ANISOU  240  CAG ULC B  11     2282   1888   1987   -114    161    -14       C
#HETATM  241  NAI ULC B  11      40.883  29.853  40.469  1.00 15.81           N
#ANISOU  241  NAI ULC B  11     2249   2030   1726   -126     63    -76       N
#HETATM  242  CAK ULC B  11      39.697  30.195  39.927  1.00 18.29           C
#ANISOU  242  CAK ULC B  11     2376   2312   2261     76    -42    -93       C
#HETATM  243  OAE ULC B  11      39.400  29.894  38.772  1.00 24.45           O
#ANISOU  243  OAE ULC B  11     3505   3206   2575    230   -598   -340       O
#HETATM  244  NAC ULC B  11      38.845  30.870  40.701  1.00 20.79           N
#ANISOU  244  NAC ULC B  11     2466   2739   2691    108    -60   -467       N
#HETATM  245  O   HOH C   1      44.575  31.750  49.271  1.00 23.76           O
#HETATM  246  O   HOH C   2      42.064  31.931  48.126  1.00 20.77           O
#HETATM  247  O   HOH C   3      44.937  31.821  41.227  1.00 26.90           O
#HETATM  248  O   HOH C   4      49.900  23.419  42.909  1.00 30.88           O
#HETATM  249  O   HOH C   5      48.759  21.203  44.159  1.00 25.08           O
#HETATM  250  O   HOH C   7      50.312  22.401  51.219  1.00 26.55           O
#HETATM  251  O   HOH C   8      47.695  25.778  36.170  1.00 38.27           O
#HETATM  252  O   HOH C   9      50.308  25.261  45.006  1.00 32.17           O
#HETATM  253  O   HOH C  10      46.798  30.976  47.489  1.00 33.69           O
#HETATM  254  O   HOH C  11      47.575  29.354  45.229  1.00 35.69           O
#HETATM  255  O   HOH C  12      30.775  32.385  50.490  1.00 27.08           O
#HETATM  256  O   HOH C  13      48.582  27.067  46.615  1.00 35.92           O
#HETATM  257  CAC EOE D   1      34.268  21.103  46.689  1.00 36.45           C
#ANISOU  257  CAC EOE D   1     5141   3927   4779   -866   -823   -283       C
#HETATM  258  CAE EOE D   1      34.257  22.340  45.786  1.00 35.10           C
#ANISOU  258  CAE EOE D   1     4514   4102   4720   -460   -574   -198       C
#HETATM  259  OAG EOE D   1      34.088  23.521  46.590  1.00 35.22           O
#ANISOU  259  OAG EOE D   1     4701   4023   4658   -354   -217    -57       O
#HETATM  260  CAF EOE D   1      34.371  24.669  45.836  1.00 30.29           C
#ANISOU  260  CAF EOE D   1     3850   3885   3771     57   -350   -166       C
#HETATM  261  CAD EOE D   1      33.611  25.837  46.478  1.00 29.19           C
#ANISOU  261  CAD EOE D   1     3278   4250   3561    149   -511   -169       C
#HETATM  262  OAB EOE D   1      34.155  27.098  46.048  1.00 27.87           O
#ANISOU  262  OAB EOE D   1     3488   4538   2560    326   -422    149       O
#HETATM  263  CAA DIO E   1      39.513  26.431  36.475  1.00 24.70           C
#ANISOU  263  CAA DIO E   1     2944   3248   3191    298    128    -90       C
#HETATM  264  OAE DIO E   1      38.746  27.437  37.175  1.00 25.89           O
#ANISOU  264  OAE DIO E   1     2879   3557   3398    249    208   -373       O
#HETATM  265  CAC DIO E   1      37.565  26.900  37.694  1.00 24.65           C
#ANISOU  265  CAC DIO E   1     3121   3341   2903    143    176   -162       C
#HETATM  266  CAD DIO E   1      36.765  26.330  36.531  1.00 25.27           C
#ANISOU  266  CAD DIO E   1     3143   3313   3145     37     83   -145       C
#HETATM  267  OAF DIO E   1      37.538  25.325  35.861  1.00 25.96           O
#ANISOU  267  OAF DIO E   1     3369   3015   3478    214    115     81       O
#HETATM  268  CAB DIO E   1      38.709  25.860  35.404  1.00 24.05           C
#ANISOU  268  CAB DIO E   1     3028   2955   3154    465    107   -174       C
